# Supplementary material for: An Intravenous Pharmacokinetic Study of Cannabidiol Solutions in Piglets through the Application of a Validated Ultra-High-Pressure Liquid Chromatography Coupled to Tandem Mass Spectrometry Method for the Simultaneous Quantification of CBD and Its Carboxylated Metabolite in Plasma
Source: MDPI journal article supplement (doi:10.3390/pharmaceutics16010140), 2024-01-20
Supplement: s1 [file s1]

Supplementary materials:

**Table S1.** Calibration standard preparation.

|                   | Blank    | Std 1       | Std 2      | Std 3      | Std 4      | Std 5      | Std 6      |              |
|-------------------|----------|-------------|------------|------------|------------|------------|------------|--------------|
| <b>CBD</b>        | <b>0</b> | <b>0.50</b> | <b>2.0</b> | <b>5.0</b> | <b>10</b>  | <b>25</b>  | <b>50</b>  | <b>ng/mL</b> |
| <b>7-COOH-CBD</b> | <b>0</b> | <b>5.0</b>  | <b>20</b>  | <b>50</b>  | <b>100</b> | <b>250</b> | <b>500</b> | <b>ng/mL</b> |
| <b>Plasma</b>     | 500      | 450         | 480        | 450        | 480        | 450        | 450        | μL           |
| <b>SF1</b>        | -        | -           | -          | -          | -          | -          | 50         | μL           |
| <b>SF2</b>        | -        | -           | -          | -          | 20         | 50         | -          | μL           |
| <b>SF3</b>        | -        | -           | 20         | 50         | -          | -          | -          | μL           |
| <b>SF4</b>        | -        | 50          | -          | -          | -          | -          | -          | μL           |

**Table S2.** Validation standard preparation.

|                   | Val 1       | Val 2      | Val 3      | Val 4      |              |
|-------------------|-------------|------------|------------|------------|--------------|
| <b>CBD</b>        | <b>0.50</b> | <b>1.5</b> | <b>15</b>  | <b>50</b>  | <b>ng/mL</b> |
| <b>7-COOH-CBD</b> | <b>5.0</b>  | <b>15</b>  | <b>150</b> | <b>500</b> | <b>ng/mL</b> |
| <b>Plasma</b>     | 450         | 485        | 470        | 450        | μL           |
| <b>SF1</b>        | -           | -          | -          | 50         | μL           |
| <b>SF2</b>        | -           | -          | 30         | -          | μL           |
| <b>SF3</b>        | -           | 15         |            |            | μL           |
| <b>SF4</b>        | 50          | -          | -          | -          | μL           |

**Table S3.** Quality control (QC) sample preparation.

|                   | QC1        | QC2        | QC3        |              |
|-------------------|------------|------------|------------|--------------|
| <b>CBD</b>        | <b>1.5</b> | <b>15</b>  | <b>50</b>  | <b>ng/mL</b> |
| <b>7-COOH-CBD</b> | <b>15</b>  | <b>150</b> | <b>500</b> | <b>ng/mL</b> |
| <b>Plasma</b>     | 485        | 470        | 450        | μL           |
| <b>SF1</b>        | -          | -          | 50         | μL           |
| <b>SF2</b>        | -          | 30         | -          | μL           |
| <b>SF3</b>        | 15         | -          | -          | μL           |

**Table S4.** Linearity.

|                   | Linear regression model | r <sup>2</sup> | r      | Residual sum of square |
|-------------------|-------------------------|----------------|--------|------------------------|
| <b>CBD</b>        | y = 0.004757 + 1.006x   | 0.9987         | 0.9994 | 30.63                  |
| <b>7-COOH-CBD</b> | y = 1.505 + 0.9717 x    | 0.9985         | 0.9992 | 3509                   |

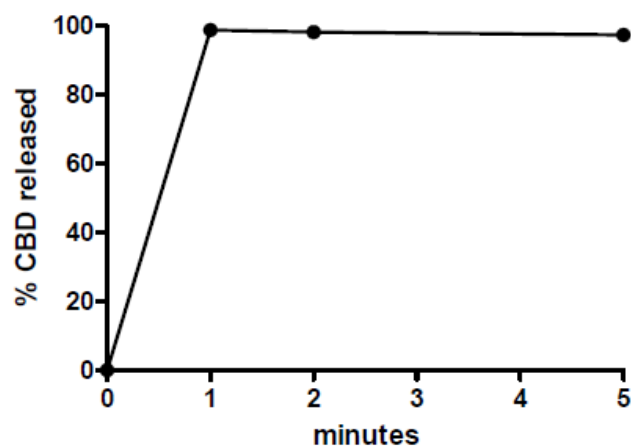

**Figure S1.** *In vitro* drug release of CBD within the CBD: HP- $\beta$ -CD spray-dried complex in sink conditions; medium at pH 6.8 + 1% SLS; 37 °C, Withdrawals at 1, 2 and 5 minutes were filtered through PTFE 0.2  $\mu$ m prior to HPLC analysis via validated method (n = 2).
